# Supplementary material for: Distribution and drivers of symbiotic and free-living diazotrophic cyanobacteria in the western tropical South Pacific
Source: Copernicus journal article supplement (doi:10.5194/bg-15-1559-2018), 2018-03-15
Supplement: Supplementary file 1 [file bg-15-1559-2018-supplement.zip]

Supplement of Biogeosciences, 15, 1559–1578, 2018  
<https://doi.org/10.5194/bg-15-1559-2018-supplement>  
© Author(s) 2018. This work is distributed under  
the Creative Commons Attribution 3.0 License.

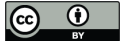

*Supplement of*

## **Distribution and drivers of symbiotic and free-living diazotrophic cyanobacteria in the western tropical South Pacific**

**Marcus Stenegren et al.**

*Correspondence to:* Marcus Stenegren ([marcus.stenegren@su.se](mailto:marcus.stenegren@su.se))

- [bg-15-1559-2018-supplement-title-page.pdf](#)
- [Suppl. Fig. and Tables Revised.xlsx](#)

The copyright of individual parts of the supplement might differ from the CC BY 3.0 License.
